# Supplementary material for: Which density functional should be used to study actinyl complexes?
Source: Royal Society of Chemistry journal article supplement (doi:10.1039/b821577d), 2009-01-01
Supplement: b821577d.pdf [file b821577d.pdf]

## Which density functional should be used to study actinyl complexes ?

Jonathan P Austin, Neil A Burton, Ian H Hillier\*, Mahesh Sundararajan and Mark A Vincent

Table S1.

Coordinates (Å) of aqua complexes  $[\text{AnO}_2(\text{H}_2\text{O})_5]\text{X}^+ \cdot 10\text{H}_2\text{O}$  (An=Np, Pu or U, X = 1 or 2)

-----  
[NpO<sub>2</sub>(H<sub>2</sub>O)<sub>5</sub>]<sup>+</sup> · 10H<sub>2</sub>O  
-----

|    |           |           |           |
|----|-----------|-----------|-----------|
| 93 | -0.314734 | -0.078548 | 0.236787  |
| 8  | -0.261371 | -0.350402 | 2.063525  |
| 8  | 2.141017  | 0.124384  | -0.159103 |
| 8  | -0.369149 | 0.233200  | -1.617342 |
| 8  | 0.469201  | 2.283840  | 0.769189  |
| 8  | 0.735910  | -2.321566 | 0.083791  |
| 8  | -2.381383 | 1.331129  | 0.445267  |
| 8  | -2.150170 | -1.696926 | -0.109308 |
| 1  | 2.626892  | -0.330256 | 0.585956  |
| 1  | 2.355146  | -0.390860 | -1.008517 |
| 1  | 1.344919  | 2.200063  | 1.302915  |
| 1  | 0.647812  | 2.717045  | -0.113190 |
| 1  | 0.738328  | -2.851761 | 0.918143  |
| 1  | 0.674516  | -2.902475 | -0.729608 |
| 1  | -2.241117 | 1.993212  | 1.219865  |
| 1  | -2.522717 | 1.920021  | -0.385072 |
| 1  | -3.071571 | -1.375197 | 0.209666  |
| 1  | -2.240474 | -1.898771 | -1.078386 |
| 8  | 3.143079  | -0.726906 | 2.248532  |
| 1  | 2.497639  | -1.430085 | 2.575950  |
| 1  | 4.040128  | -1.062776 | 2.447662  |
| 8  | 2.625698  | -1.177179 | -2.464013 |
| 1  | 1.996160  | -1.944483 | -2.549849 |

Supplementary Material (ESI) for PCCP  
This journal is © the Owner Societies 2009

|   |           |           |           |
|---|-----------|-----------|-----------|
| 1 | 3.517967  | -1.570003 | -2.543470 |
| 8 | 2.532059  | 2.000300  | 2.379653  |
| 1 | 2.738329  | 1.027532  | 2.469500  |
| 1 | 3.363285  | 2.397067  | 2.048473  |
| 8 | 0.187774  | 2.876956  | -1.880922 |
| 1 | 0.116136  | 1.882447  | -2.006066 |
| 1 | 0.777493  | 3.205568  | -2.590244 |
| 8 | 1.158031  | -2.490221 | 2.780156  |
| 1 | 0.484658  | -1.743142 | 2.736362  |
| 1 | 0.989165  | -2.971429 | 3.616009  |
| 8 | 0.691689  | -3.207436 | -2.434432 |
| 1 | -0.177446 | -2.797248 | -2.749469 |
| 1 | 0.734896  | -4.107941 | -2.814714 |
| 8 | -1.666283 | 3.091013  | 2.249906  |
| 1 | -1.566565 | 2.710719  | 3.147176  |
| 1 | -0.755702 | 3.016628  | 1.843468  |
| 8 | -2.563317 | 2.906575  | -1.675160 |
| 1 | -1.601941 | 3.092870  | -1.869474 |
| 1 | -2.954301 | 3.772854  | -1.439681 |
| 8 | -4.361873 | -0.527476 | 0.649883  |
| 1 | -4.605737 | -0.695703 | 1.583101  |
| 1 | -3.830630 | 0.321118  | 0.661895  |
| 8 | -1.559488 | -1.828015 | -2.829776 |
| 1 | -1.158985 | -0.934118 | -2.586205 |
| 1 | -2.094363 | -1.693638 | -3.638859 |

-----  
[NpO2 (H2O5) ] 2+ . 10H2O  
-----

|    |           |           |           |
|----|-----------|-----------|-----------|
| 93 | -0.030510 | 0.004021  | -0.000056 |
| 8  | -0.029606 | 0.006961  | 1.773632  |
| 8  | 2.372044  | 0.136603  | -0.003544 |
| 8  | -0.028968 | 0.006694  | -1.773730 |
| 8  | 0.574674  | 2.329094  | 0.002901  |
| 8  | 0.849572  | -2.238564 | 0.003422  |
| 8  | -2.060401 | 1.295164  | -0.000744 |
| 8  | -1.886544 | -1.529590 | -0.001823 |

Supplementary Material (ESI) for PCCP  
This journal is © the Owner Societies 2009

|   |           |           |           |
|---|-----------|-----------|-----------|
| 1 | 2.706966  | -0.302687 | 0.837696  |
| 1 | 2.703470  | -0.303218 | -0.846766 |
| 1 | 1.098314  | 2.504023  | 0.846222  |
| 1 | 1.097738  | 2.507279  | -0.839282 |
| 1 | 0.540934  | -2.693913 | 0.845343  |
| 1 | 0.542440  | -2.697112 | -0.836740 |
| 1 | -2.069414 | 1.846968  | 0.841029  |
| 1 | -2.068372 | 1.846922  | -0.842906 |
| 1 | -2.415896 | -1.375880 | 0.839274  |
| 1 | -2.414469 | -1.375206 | -0.843871 |
| 8 | 2.508857  | -0.506155 | 2.608103  |
| 1 | 1.805057  | -1.191371 | 2.767960  |
| 1 | 3.286785  | -0.792032 | 3.132812  |
| 8 | 2.507894  | -0.514683 | -2.608794 |
| 1 | 1.804789  | -1.201626 | -2.765994 |
| 1 | 3.287090  | -0.802727 | -3.130380 |
| 8 | 1.255499  | 2.257538  | 2.600010  |
| 1 | 1.689923  | 1.376344  | 2.756889  |
| 1 | 1.774442  | 2.909707  | 3.117253  |
| 8 | 1.245826  | 2.261933  | -2.600764 |
| 1 | 1.679081  | 1.381142  | -2.760549 |
| 1 | 1.761676  | 2.913963  | -3.121334 |
| 8 | 0.286199  | -2.558348 | 2.619648  |
| 1 | -0.585316 | -2.104206 | 2.774827  |
| 1 | 0.258160  | -3.382565 | 3.150806  |
| 8 | 0.292915  | -2.559947 | -2.616876 |
| 1 | -0.577728 | -2.105269 | -2.774322 |
| 1 | 0.266115  | -3.383356 | -3.149379 |
| 8 | -1.784964 | 1.904640  | 2.607588  |
| 1 | -0.813611 | 2.046313  | 2.764052  |
| 1 | -2.245114 | 2.594117  | 3.132134  |
| 8 | -1.781938 | 1.908690  | -2.605956 |
| 1 | -0.810224 | 2.051840  | -2.760969 |
| 1 | -2.242367 | 2.598932  | -3.129221 |
| 8 | -2.369520 | -1.091991 | 2.614007  |
| 1 | -2.208284 | -0.123633 | 2.771973  |

Supplementary Material (ESI) for PCCP  
This journal is © the Owner Societies 2009

|   |           |           |           |
|---|-----------|-----------|-----------|
| 1 | -3.161374 | -1.322356 | 3.145275  |
| 8 | -2.367716 | -1.090451 | -2.616813 |
| 1 | -2.205674 | -0.122197 | -2.773996 |
| 1 | -3.159840 | -1.319824 | -3.148080 |

-----  
[PuO2 (H2O) 5] 1+ .10H2O  
-----

|    |           |           |           |
|----|-----------|-----------|-----------|
| 94 | -0.020974 | -0.004914 | 0.030348  |
| 8  | -0.030677 | -0.012229 | 1.843175  |
| 8  | 2.479817  | 0.256179  | -0.002582 |
| 8  | -0.028499 | -0.005361 | -1.779712 |
| 8  | 0.472725  | 2.463133  | 0.014976  |
| 8  | 0.974908  | -2.303813 | 0.012030  |
| 8  | -2.206322 | 1.224865  | 0.005064  |
| 8  | -1.884595 | -1.671416 | 0.001721  |
| 1  | 2.750033  | -0.254477 | 0.807567  |
| 1  | 2.725286  | -0.237843 | -0.831994 |
| 1  | 1.042488  | 2.547046  | 0.827738  |
| 1  | 1.022960  | 2.545078  | -0.810276 |
| 1  | 0.582207  | -2.721106 | 0.825639  |
| 1  | 0.592391  | -2.706794 | -0.812714 |
| 1  | -2.113763 | 1.798205  | 0.813686  |
| 1  | -2.111187 | 1.771644  | -0.821845 |
| 1  | -2.404989 | -1.420411 | 0.811946  |
| 1  | -2.380604 | -1.422285 | -0.824013 |
| 8  | 2.479645  | -0.498705 | 2.663246  |
| 1  | 1.747157  | -1.170510 | 2.728965  |
| 1  | 3.204694  | -0.841104 | 3.225710  |
| 8  | 2.447789  | -0.486694 | -2.671145 |
| 1  | 1.722065  | -1.169631 | -2.728950 |
| 1  | 3.176888  | -0.823605 | -3.231642 |
| 8  | 1.230190  | 2.209164  | 2.661380  |
| 1  | 1.642221  | 1.303427  | 2.725493  |
| 1  | 1.789583  | 2.795898  | 3.211044  |
| 8  | 1.177913  | 2.203183  | -2.662769 |
| 1  | 1.598232  | 1.300349  | -2.723352 |

Supplementary Material (ESI) for PCCP  
This journal is © the Owner Societies 2009

|   |           |           |           |
|---|-----------|-----------|-----------|
| 1 | 1.721436  | 2.789983  | -3.228191 |
| 8 | 0.271727  | -2.542745 | 2.671510  |
| 1 | -0.545783 | -1.977245 | 2.720268  |
| 1 | 0.092514  | -3.318752 | 3.240634  |
| 8 | 0.297783  | -2.508381 | -2.671242 |
| 1 | -0.532758 | -1.959526 | -2.722257 |
| 1 | 0.144640  | -3.279327 | -3.254770 |
| 8 | -1.744606 | 1.875317  | 2.657200  |
| 1 | -0.756036 | 1.975089  | 2.724885  |
| 1 | -2.124539 | 2.589976  | 3.208379  |
| 8 | -1.742662 | 1.838554  | -2.660448 |
| 1 | -0.753529 | 1.955630  | -2.722188 |
| 1 | -2.133414 | 2.542791  | -3.217514 |
| 8 | -2.347971 | -1.062042 | 2.660152  |
| 1 | -2.070530 | -0.107840 | 2.711321  |
| 1 | -3.143567 | -1.137183 | 3.225466  |
| 8 | -2.300472 | -1.068014 | -2.674603 |
| 1 | -2.047145 | -0.105488 | -2.724592 |
| 1 | -3.084061 | -1.168094 | -3.252773 |

-----  
[PuO2 (H2O) 5] 2+ . 10H2O  
-----

|    |           |           |           |
|----|-----------|-----------|-----------|
| 94 | -0.024935 | -0.000823 | 0.040202  |
| 8  | -0.026882 | -0.007848 | 1.800532  |
| 8  | 2.377250  | 0.154309  | -0.011256 |
| 8  | -0.024871 | -0.002682 | -1.719333 |
| 8  | 0.562365  | 2.329826  | 0.007953  |
| 8  | 0.872658  | -2.232525 | 0.005003  |
| 8  | -2.058843 | 1.281749  | -0.004275 |
| 8  | -1.870779 | -1.536147 | -0.005482 |
| 1  | 2.711276  | -0.312016 | 0.813973  |
| 1  | 2.690905  | -0.289955 | -0.859545 |
| 1  | 1.108869  | 2.494472  | 0.837368  |
| 1  | 1.079579  | 2.503614  | -0.837036 |
| 1  | 0.533943  | -2.692293 | 0.833460  |
| 1  | 0.554608  | -2.678061 | -0.838798 |

Supplementary Material (ESI) for PCCP  
This journal is © the Owner Societies 2009

|   |           |           |           |
|---|-----------|-----------|-----------|
| 1 | -2.047111 | 1.856076  | 0.821375  |
| 1 | -2.053983 | 1.827541  | -0.850441 |
| 1 | -2.413726 | -1.351695 | 0.821028  |
| 1 | -2.388278 | -1.365371 | -0.851796 |
| 8 | 2.510599  | -0.491975 | 2.611004  |
| 1 | 1.825014  | -1.190321 | 2.783879  |
| 1 | 3.300070  | -0.755104 | 3.130493  |
| 8 | 2.492783  | -0.496672 | -2.611940 |
| 1 | 1.806061  | -1.201064 | -2.762652 |
| 1 | 3.278025  | -0.767534 | -3.133692 |
| 8 | 1.261093  | 2.240524  | 2.610701  |
| 1 | 1.704488  | 1.362897  | 2.763964  |
| 1 | 1.773954  | 2.900624  | 3.123184  |
| 8 | 1.212625  | 2.250688  | -2.607665 |
| 1 | 1.657665  | 1.373409  | -2.753070 |
| 1 | 1.713064  | 2.903916  | -3.141000 |
| 8 | 0.265728  | -2.582274 | 2.615408  |
| 1 | -0.611509 | -2.142012 | 2.771821  |
| 1 | 0.239055  | -3.419418 | 3.125998  |
| 8 | 0.294609  | -2.557786 | -2.610261 |
| 1 | -0.585154 | -2.118538 | -2.759225 |
| 1 | 0.275912  | -3.383321 | -3.139821 |
| 8 | -1.762720 | 1.908742  | 2.608550  |
| 1 | -0.791906 | 2.048261  | 2.769623  |
| 1 | -2.228058 | 2.599726  | 3.125728  |
| 8 | -1.767215 | 1.884606  | -2.609219 |
| 1 | -0.793994 | 2.035464  | -2.752034 |
| 1 | -2.231711 | 2.568392  | -3.136681 |
| 8 | -2.396071 | -1.065047 | 2.605575  |
| 1 | -2.225410 | -0.101124 | 2.777455  |
| 1 | -3.201534 | -1.293742 | 3.115820  |
| 8 | -2.362335 | -1.075044 | -2.613729 |
| 1 | -2.200901 | -0.106256 | -2.770373 |
| 1 | -3.155660 | -1.308209 | -3.140802 |

-----  
[UO2 (H2O) 5] 1+ .10H2O

Supplementary Material (ESI) for PCCP  
This journal is © the Owner Societies 2009

---

|    |           |           |           |
|----|-----------|-----------|-----------|
| 92 | 0.012216  | -0.303613 | 0.038875  |
| 8  | 0.158260  | -0.369177 | 1.931851  |
| 8  | 2.441124  | 0.143283  | -0.158886 |
| 8  | -0.047543 | -0.340784 | -1.841052 |
| 8  | 0.431431  | 2.191998  | 0.013760  |
| 8  | 1.029908  | -2.529546 | 0.042255  |
| 8  | -2.084234 | 1.103943  | 0.140046  |
| 8  | -1.981949 | -1.707073 | 0.050217  |
| 1  | 2.942635  | -0.082773 | 0.664883  |
| 1  | 2.852544  | -0.265306 | -0.990628 |
| 1  | 0.940963  | 2.436958  | 0.844654  |
| 1  | 0.967087  | 2.369443  | -0.803258 |
| 1  | 0.546466  | -3.044619 | 0.779855  |
| 1  | 0.979254  | -2.988863 | -0.837317 |
| 1  | -1.969324 | 1.659714  | 0.962309  |
| 1  | -2.013468 | 1.686506  | -0.670942 |
| 1  | -2.468329 | -1.392816 | 0.881606  |
| 1  | -2.494681 | -1.376378 | -0.771059 |
| 8  | 2.685630  | 0.160093  | 2.577735  |
| 1  | 1.769069  | -0.258733 | 2.513500  |
| 1  | 3.140134  | -0.253095 | 3.340208  |
| 8  | 2.992409  | -0.656738 | -2.607395 |
| 1  | 2.439483  | -1.476980 | -2.774102 |
| 1  | 3.883905  | -0.864206 | -2.953566 |
| 8  | 1.260403  | 2.452036  | 2.557975  |
| 1  | 1.927679  | 1.710477  | 2.702550  |
| 1  | 1.665354  | 3.263676  | 2.925692  |
| 8  | 0.977246  | 2.038764  | -2.673398 |
| 1  | 1.181589  | 1.068681  | -2.678128 |
| 1  | 1.560504  | 2.445016  | -3.346832 |
| 8  | -0.213084 | -3.208348 | 2.250633  |
| 1  | -0.151411 | -2.237919 | 2.454015  |
| 1  | -1.173691 | -3.332243 | 2.094204  |
| 8  | 1.104820  | -2.615106 | -2.686641 |
| 1  | 0.474364  | -1.839473 | -2.557663 |

Supplementary Material (ESI) for PCCP  
This journal is © the Owner Societies 2009

|   |           |           |           |
|---|-----------|-----------|-----------|
| 1 | 0.744558  | -3.149842 | -3.423588 |
| 8 | -1.621460 | 1.746050  | 2.722909  |
| 1 | -0.629050 | 1.727736  | 2.767261  |
| 1 | -1.889408 | 2.512092  | 3.270523  |
| 8 | -1.851636 | 1.882516  | -2.442245 |
| 1 | -0.873015 | 1.896615  | -2.644533 |
| 1 | -2.227973 | 2.661061  | -2.900635 |
| 8 | -2.788862 | -0.943805 | 2.504608  |
| 1 | -2.323299 | -0.086423 | 2.689409  |
| 1 | -3.734943 | -0.755701 | 2.669297  |
| 8 | -3.090977 | -0.737120 | -2.190694 |
| 1 | -2.590248 | 0.098181  | -2.391882 |
| 1 | -4.011840 | -0.438178 | -2.046417 |

-----  
[UO2 (H2O) 5] 2+ .10H2O  
-----

|    |           |           |           |
|----|-----------|-----------|-----------|
| 92 | -0.025654 | -0.004084 | -0.002179 |
| 8  | -0.027731 | -0.010607 | 1.791440  |
| 8  | 2.392588  | 0.139831  | -0.012969 |
| 8  | -0.024380 | -0.006565 | -1.796155 |
| 8  | 0.582381  | 2.338809  | 0.009344  |
| 8  | 0.857734  | -2.255634 | 0.008627  |
| 8  | -2.060979 | 1.305232  | -0.001213 |
| 8  | -1.897205 | -1.532113 | -0.005523 |
| 1  | 2.739392  | -0.290771 | 0.826610  |
| 1  | 2.728733  | -0.297086 | -0.856401 |
| 1  | 1.102587  | 2.519247  | 0.853422  |
| 1  | 1.102539  | 2.529715  | -0.830490 |
| 1  | 0.548547  | -2.709682 | 0.853309  |
| 1  | 0.552399  | -2.717657 | -0.831498 |
| 1  | -2.073374 | 1.856949  | 0.840732  |
| 1  | -2.073781 | 1.858058  | -0.843003 |
| 1  | -2.426446 | -1.375783 | 0.837275  |
| 1  | -2.425274 | -1.373903 | -0.848975 |
| 8  | 2.536320  | -0.483135 | 2.608572  |
| 1  | 1.833381  | -1.165632 | 2.772698  |

Supplementary Material (ESI) for PCCP  
This journal is © the Owner Societies 2009

|   |           |           |           |
|---|-----------|-----------|-----------|
| 1 | 3.311287  | -0.763668 | 3.140665  |
| 8 | 2.534153  | -0.518949 | -2.611339 |
| 1 | 1.830404  | -1.203523 | -2.767921 |
| 1 | 3.312521  | -0.810362 | -3.132311 |
| 8 | 1.258007  | 2.264039  | 2.605780  |
| 1 | 1.693491  | 1.383254  | 2.761954  |
| 1 | 1.775562  | 2.916123  | 3.124447  |
| 8 | 1.237933  | 2.280106  | -2.602400 |
| 1 | 1.666728  | 1.399123  | -2.766722 |
| 1 | 1.751586  | 2.930491  | -3.127195 |
| 8 | 0.281450  | -2.594171 | 2.610442  |
| 1 | -0.584965 | -2.133961 | 2.767697  |
| 1 | 0.241565  | -3.425690 | 3.129266  |
| 8 | 0.297301  | -2.595959 | -2.603972 |
| 1 | -0.566470 | -2.133697 | -2.767983 |
| 1 | 0.261164  | -3.425031 | -3.127067 |
| 8 | -1.789430 | 1.910550  | 2.606734  |
| 1 | -0.817437 | 2.040084  | 2.768151  |
| 1 | -2.243525 | 2.604825  | 3.130110  |
| 8 | -1.788718 | 1.920757  | -2.603121 |
| 1 | -0.816406 | 2.054865  | -2.762037 |
| 1 | -2.244420 | 2.617006  | -3.122444 |
| 8 | -2.402119 | -1.091533 | 2.597633  |
| 1 | -2.228307 | -0.126721 | 2.761379  |
| 1 | -3.206888 | -1.310764 | 3.113845  |
| 8 | -2.398968 | -1.086131 | -2.605975 |
| 1 | -2.225970 | -0.120969 | -2.767479 |
| 1 | -3.202696 | -1.305300 | -3.123793 |

---
